# Supplementary material for: A novel chromatin-remodeling complex variant, dcPBAF, is involved in maintaining transcription in differentiated neurons
Source: Frontiers journal article supplement (doi:10.3389/fcell.2023.1271598), 2023-11-14
Supplement: Presentation_1.pdf [file Presentation_1.pdf]

Supplementary

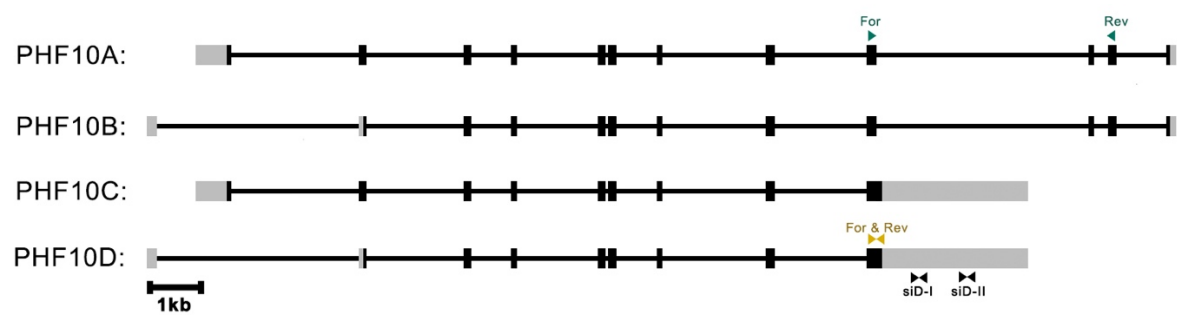

**Figure S1.** Schematic representation of PHF10 transcripts. The coding regions are indicated by black and the noncoding regions by gray boxes. Primers for PHF10A measurement depicted by dark-green arrows and primers for PHF10D measurement depicted by yellow arrows (sequences of primers are at the Table S5). Also siRNA-I and siRNA-II for PHF10D knockdown depicted black arrows (sequences of siRNA's are at the Table S4).

**Table S1.**  
The human and murine PHF10 mRNAs and protein isoforms present in the NCBI databases.

| Species     | Isoform name | other name | transcript ID |        | protein ID     |        |
|-------------|--------------|------------|---------------|--------|----------------|--------|
|             |              |            | NCBI          | Length | NCBI           | Length |
| H. sapiens  | PHF10A       | PHF10-PI   | NM_018288.4   | 2167bp | NP_060758.2    | 498aa  |
|             | PHF10B       | PHF10-Ps   | KC_839988.1   | 1651bp | AGQ_46690.1    | 451aa  |
|             | PHF10C       | PHF10-SI   | KC_839989.1   | 4395bp | AGQ_46691.1    | 377aa  |
|             | PHF10D       | PHF10-Ss   | KC_839990.1   | 3878bp | AGQ_46692.1    | 330aa  |
| M. musculus | Phf10A       | Phf10-PI   | NM_024250     | 1665bp | NP_077212.3    | 497aa  |
|             | Phf10C       | Phf10-SI   | NM_001360983  | 3992bp | NP_001347912.1 | 376 aa |

The analysis of mouse and human PHF10 transcripts has shown that like other mammals they have the splice variants encoding DPF containing isoform and DPF lacking isoform (Brechalov et al., 2014, Chugunov et. al., 2021). The human PHF10 transcripts were precisely mapped (Brechalov et al., 2014). The Northern blot analysis demonstrates that mouse and human have the same four PHF10 transcripts of the similar length. In Database are annotated mouse transcripts encoding long PHF10 isoforms: Phf10A (NM\_024250 - 1665 nt, NP\_077212.3 - 497 aa) and Phf10C (NM\_001360983 - 3992 nt, NP\_001347912.1 - 376 aa).

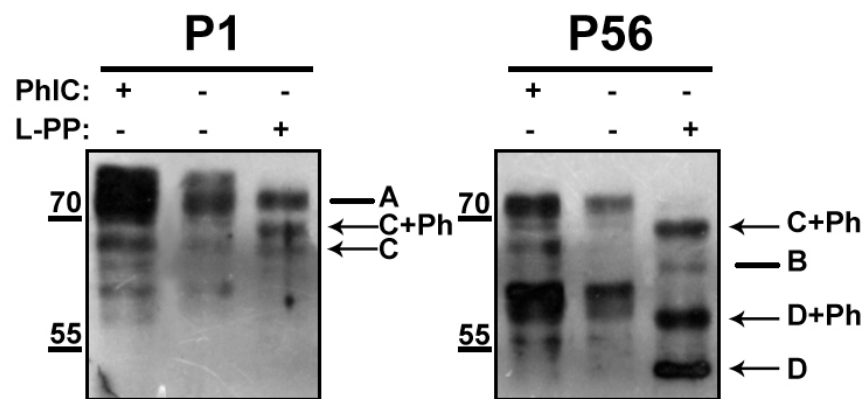

**Figure S2.** PHF10 isoforms undergo multiple phosphorylation as was confirmed on brain extracts treated with the Lambda-phosphatase (L-PP).

PHF10 is comprised of four major bands, corresponding to the described PHF10 isoforms, and several additional bands which appeared due to multiple phosphorylation the PHF10 isoforms (depicted as +Ph). Note that on Figure 1 and after, the PHF10 isoforms are indicated according to the analysis of their electrophoretic mobility performed previously (Tatarskiy et al., 2017). Each PHF10 isoform has its own specific phosphorylation pattern, due to the difference in their structure. PhIC + – nuclear extract prepared with Phosphatase inhibitor cocktail addition. L-PP + – nuclear extract prepared with Lambda phosphatase addition.

**Table S2.** Proteins co-precipitated by anti-PHF10 antibodies were eluted and identified by MALDI-TOFF.

| Low salt PBAF - P56 | High salt PBAF - P56 |
|---------------------|----------------------|
| BRG1                | BRG1+BAF180          |
| BAF180              | BAF180               |
| BAF170              | BAF170               |
| BAF155              | BAF180+BAF155        |
| TAF4A               | BAF180+BAF170        |
| BAF170              | BAF170               |
| BAF170              | BAF170               |
| BAF170              | BRD7                 |
| TAF5                | PHF10                |
| BAF170              | BAF60A               |
| TAF6                | BAF60C               |
| BAF170              | BAF57                |
| PHF10               | BAF47                |
| keratin             | BAF47                |
| BAF60A              | BAF47                |
| BAF60C              | actin                |
| BAF57               | TfII-I               |
| BAF47               | Ilf2                 |
| BAF47               |                      |
| actin               |                      |

|                       |  |
|-----------------------|--|
| Ilf2<br>Pcsk6<br>TAF9 |  |
|-----------------------|--|

| Low salt PBAF – P1 | Copurified proteins | High salt PBAF - P1 | Copurified proteins |
|--------------------|---------------------|---------------------|---------------------|
| Galnt2             |                     | BRG1                | BAF190B             |
| BRG1               |                     | BAF180              | Ccdc88C             |
| BAF180             | Map6                | BAF170              | Rock1               |
| BAF170             | Dna2                | BAF155              |                     |
| BAF170             | Iqgap2, Znf407      | BAF170              | Vav3, Lrrtm2        |
| Pacs1              |                     | BAF155              | PkC                 |
| BAF170             |                     | Rasal3              | Rock1, Dna2         |
| PHF10              | Tsga10              | BAF155+BAF170       | Rock1 Zc3h12        |
| BAF170             | Adams15,Pibf1       | BRD7                | Rnf213              |
| TAF5               | ccp110              | PHF10               | Ercc1, Haus1        |
| IgG                | Ddb2                | PHF10               |                     |
| TAF6               |                     | BAF60A              | D15Kzl              |
| BAF170             | Tin2, Rcor2         | BAF60C              | Zfp709l1            |
| PHF10              |                     | BAF57+BAF60C        |                     |
| BAF60A             | Wdr37               | BAF57               |                     |
| Wdr37              | Znf592              | BAF47               |                     |
| BAF57              |                     | BAF47               |                     |
| BAF57              | Samd3               | actin               |                     |
| BAF47              |                     |                     |                     |
| Cnot2              |                     |                     |                     |
| BAF47              | Nr1d2               |                     |                     |
| actin              |                     |                     |                     |
| Sh3d19             | Skor1               |                     |                     |
| TAF9               |                     |                     |                     |

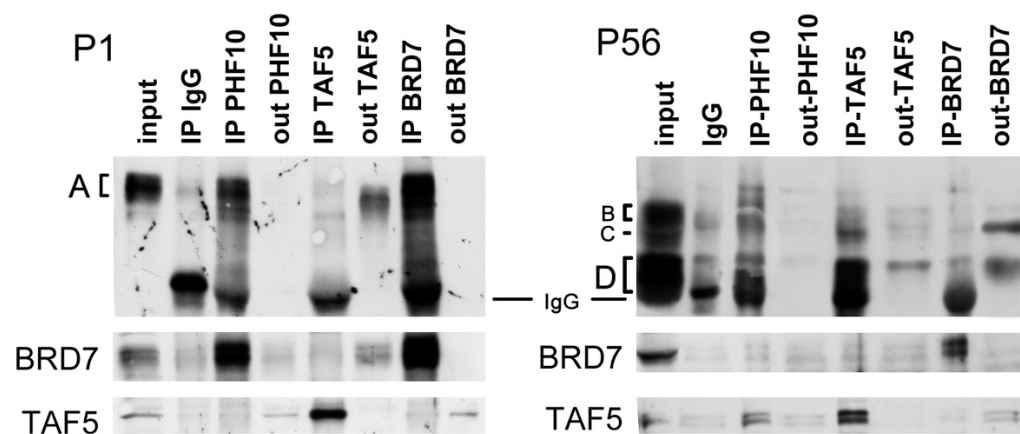

**Figure S3.** Western Blot of proteins precipitated with antibodies against PHF10 and BRD7 from P1 and P56 extracts. Western blot was developed with antibodies against PHF10 and BRD7 (indicated on the left). The obtained results show that antibodies against PHF10 co-precipitate BRD7 from P1 extract containing PHF10A isoform and PBAF complex. From P56 extract which contains PHF10D (associated with dcPBAF), the antibodies against PHF10 do not co-precipitate BRD7. These results are confirmed in reciprocal precipitation with antibodies against BRD7.

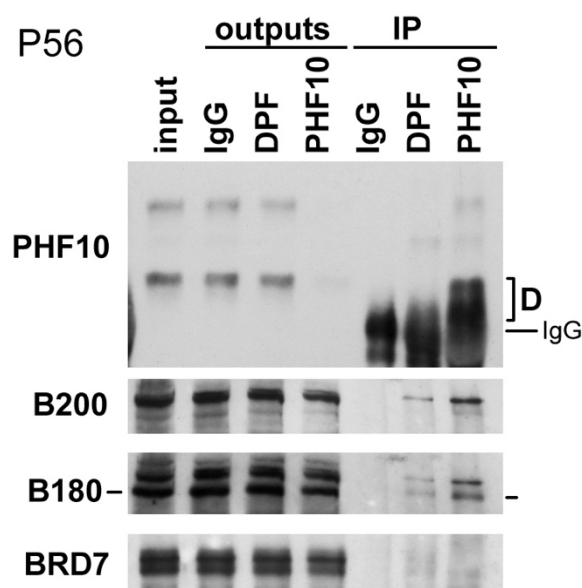

**Figure S4.** Western Blot analysis of the PBAF subunits precipitated with antibodies against DPF-domain and against total PHF10 from nuclear extracts of P56 murine brain. Anti-PHF10 antibodies precipitate PHF10D from P56 extract. They also co-precipitate BAF200, BAF180 but not BRD7, suggesting that BAF200 and BAF180 are associated with dcPBAF even in the absence of BRD7. Note that the Input on Supplementary Fig. 5 differs from Input on Supplementary Fig. 6 due to the different amount of extract loaded per lane.

## PHF10 isoforms

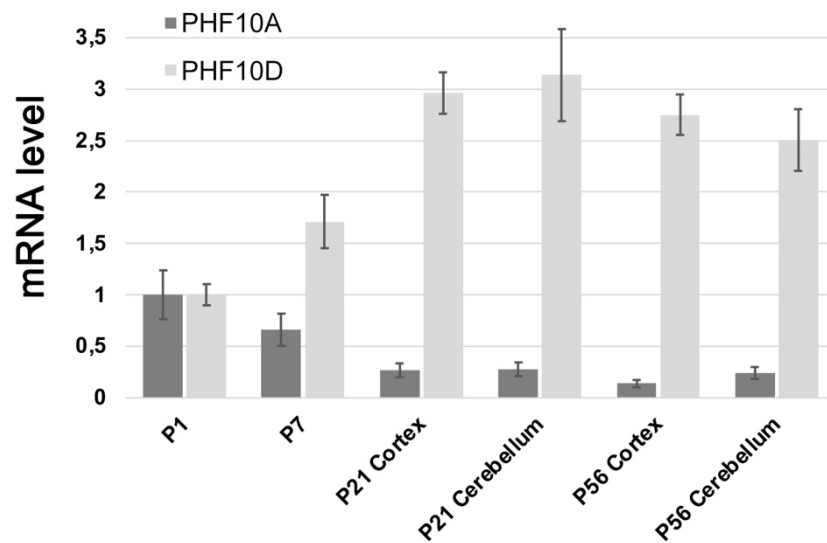

**Figure S5.** The levels of *PHF10A* and *PHF10A* isoforms in murine postnatal of brain. The levels of *PHF10A* and *PHF10D* isoforms during development were calculated relatively P1 expression. The values were normalized to the *actin* and *B2M* housekeeping genes according to MIQE guidelines (Bustin et al., 2009). At least three independent experiments were performed; values are mean  $\pm$  SD.

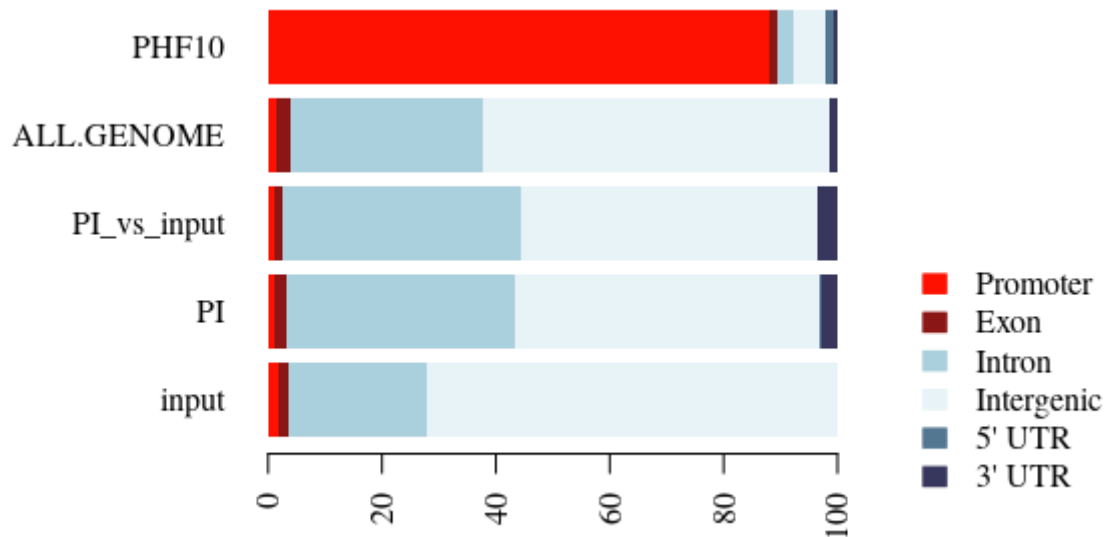

**Figure S6.** The distribution of genomic elements in the PHF10 binding sites and in the random sites distributed uniformly along the genome (N=301).

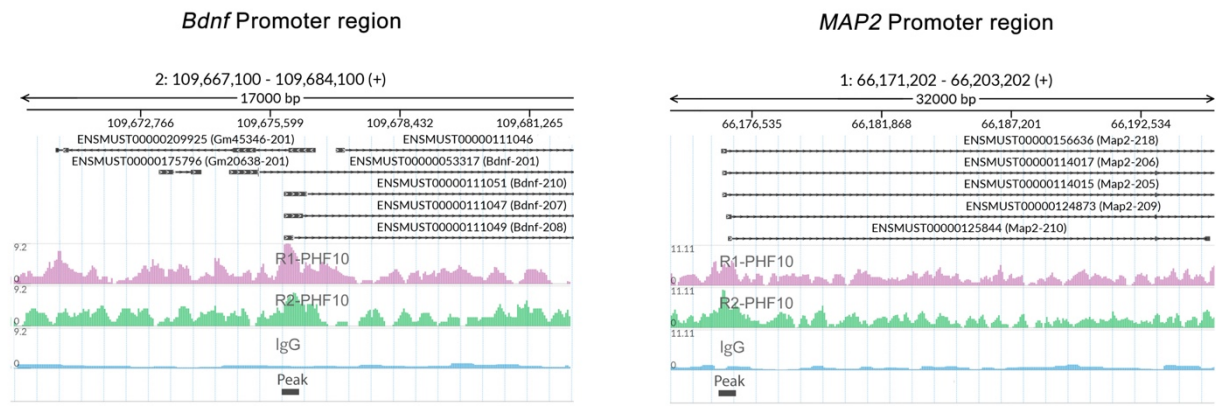

**Figure S7.** The results of ChIPseq showing the peaks of PHF10 from replicates and IgG (PI) at the promoters of mouse neuronal genes *Bdnf* and *MAP2* homologues to human genes shown at Figure 6.

| Housekeeping genes |               | Neuron-specific genes |         |
|--------------------|---------------|-----------------------|---------|
| Calm1              | Kdm5a         | Ckb                   | Tprn    |
| Tcf25              | Nsmce1        | Ikzf4                 | Tenm2   |
| Ykt6               | Fus           | Elavl3                | Map1b   |
| Calr               | D230025D16Rik | Clstn3                | Scrt2   |
| Ulk2               | Spg11         | Eef1a2                | Ccdc62  |
| Jkamp              | Cdk10         | Cntnap1               | Rpl7a   |
| Kctd20             | Chmp2a        | Rmnd1                 | Kcnc3   |
| Ctnnb1             | Exoc3         | Vegfa                 | Tuba1a  |
| Zfp655             | Map2k2        | Nrxn1                 | Hist4h4 |
| H3f3b              | Zdhhc17       | Celf4                 |         |
| Zfp207             | Nufip2        | Cabyr                 |         |
| Ywhah              | Tmem183a      | Rbfox3                |         |
| Rab21              | Mgat2         | Nptx1                 |         |
| Yeats4             | Saysd1        | Tmeff2                |         |
| Hint1              | B230219D22Rik | Efcab2                |         |
| Hnrnpab            | Tmco1         | Stmn1                 |         |
| Canx               | Mat2a         | Errfi1                |         |
| Dbn1               | Cd47          | Nsg1                  |         |
| Cox11              | Tsnax         | Acad10                |         |
| Dnajc27            | Rpl32         | Uncx                  |         |
| Ddx5               | Zc3h4         | Slc25a4               |         |
| Pafah1b1           | Taok2         | Zic1                  |         |
| Ube2g1             | BC003965      | Shf                   |         |
| Tmx1               | Chrac1        | Neurod1               |         |
| Btf3               | D2hgdh        | Arpp21                |         |
| Sub1               | Arih1         | Lrrn1                 |         |
| Eif4a2             | Rabgef1       | Dusp5                 |         |
| Denr               | Hspa5         | Ints6                 |         |
| Hsp90ab1           | Gpvd1         | Zic4                  |         |

|       |         |        |
|-------|---------|--------|
| Brd4  | Psmc5   | Cpeb2  |
| Cmtr1 | Pdia3   | Atp1b2 |
| Srsf7 | Nop56   | Nrep   |
| Ring1 | Arfgap1 | Cnr1   |
| Ercc3 | Raly    | Saysd1 |
| Chuk  | Slc35a1 | Insig1 |
| Ssbp1 | Trna1ap | Gap43  |
| Gfpt1 | Rab35   | Gpr85  |

**Table S3.** Housekeeping and neuron-specific genes controlled by dcPBAF in adult (120P) mouse brain.

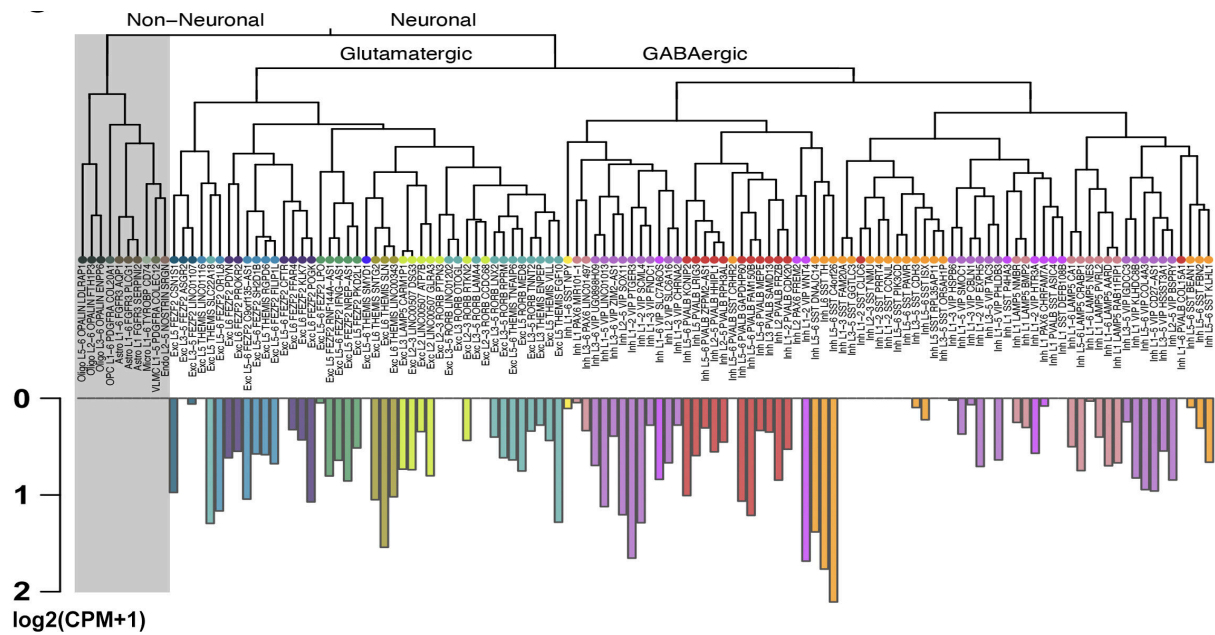

**Figure S8** Trimmed mean expression (25%-75%, log2(CPM+1)) of PHF10 in different cell types, hierarchically clustered based on the gene expression data provided by the Allen Brain Atlas (<https://portal.brain-map.org/atlas-and-data/rnaseq/human-m1-10x>) (Sunkin et al. 2013; Bakken et al. 2021).

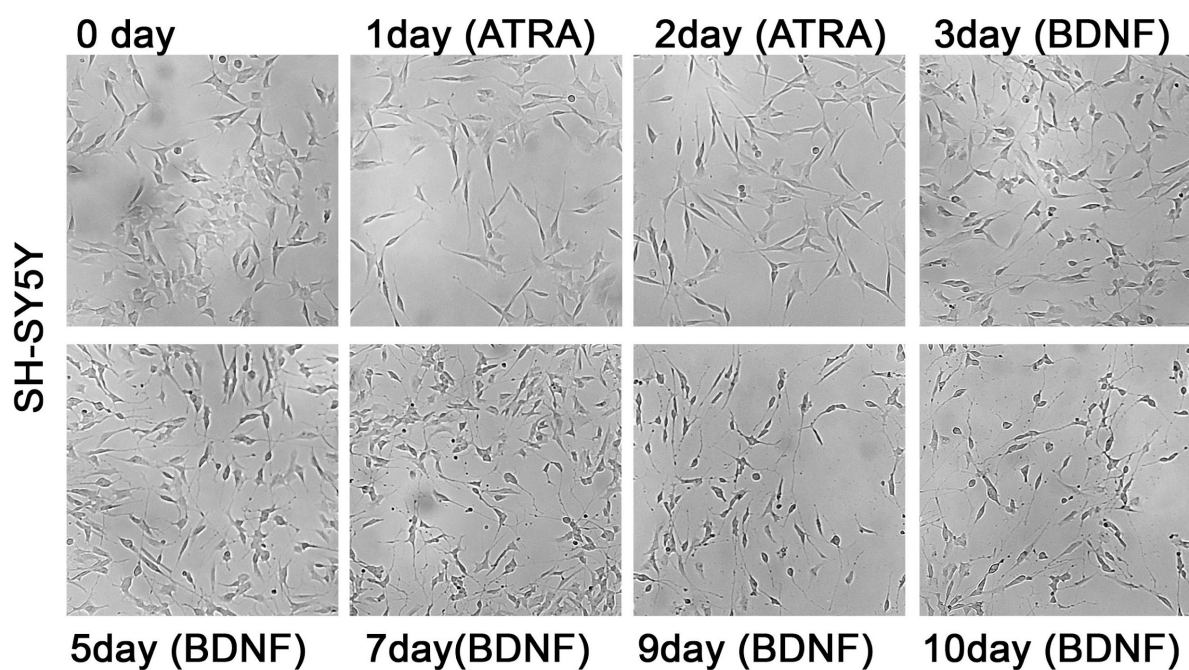

**Figure S9.** SH-SY5Y differentiation after ATRA and BDNF treatment during 10 days

**Table S4.** siRNA sequences for PHF10D and Control knockdowns in SH-SY5Y cells.

| Name of siRNA         | Sequence (5'-3')        |
|-----------------------|-------------------------|
| PHF10-D_siRNAi(I)_for | GCUGUACAGUUUCAUAUUdTdT  |
| PHF10-D_siRNAi(I)_rev | AAUAUGAAACUGUACAGCdTdT  |
| PHF10-D_siRNA(II)_for | GCUAAAGGUCAUAGUUUAdTdT  |
| PHF10-D_siRNA(II)_rev | UAAACUAUGACCUUUAGCdTdT  |
| Control_siRNA_for     | AGGUCGAACUACGGGUCAAdTdC |
| Control_siRNA_rev     | UUGACCCGUAGUUCGACCUdAdG |

**Table S5.** Sequences of primers for mRNA measurement.

| Name of mRNA Primers | Sequence (5'-3')      |
|----------------------|-----------------------|
| RPLP0_mRNA_for       | ACTGGAGACAAAGTGGGAGCC |
| RPLP0_mRNA_rev       | CAGACACTGGCAACATTGCG  |



|                          |                            |
|--------------------------|----------------------------|
| PHF10-total_mRNA_for     | CCGGGAACGCATGGAAGAAAG      |
| PHF10-total_mRNA_rev     | CACCATCACTGTCTAGAGCAGGGAGC |
| PHF10-A_mRNA_for         | CCAGGGAAGACAGAAATCAAAAGAC  |
| PHF10-A_mRNA_rev         | CCATTGTCATATCCAGGCAAGAAGG  |
| PHF10-D_mRNA_for         | CCAGGGAAGACAGAAATCAAAAGAC  |
| PHF10-D_mRNA_rev         | CAGGGGCTTTTTTCTTCTACCTTG   |
| BDNF_mRNA_for            | GGAGCTGAGCGTGTGTGACAG      |
| BDNF_mRNA_rev            | GGGATTGCACTTGGTCTCGTAG     |
| MAP2_mRNA_for            | GCTCATCATGTACCTGGAGGTG     |
| MAP2_mRNA_rev            | GGTGATGCCACGCTGGATCTG      |
| TrkB_mRNA_for            | CTGTAGTGTGGCAGGTGATCCG     |
| TrkB_mRNA_rev            | GATCTGCTTCCCACTGTCATCG     |
| NREP_mRNA_for            | TTGTCTGGGTCAGTCAAGAACC     |
| NREP_mRNA_rev            | GAGCGGAGTTCACTGCTGC        |
| ELAVL3_mRNA_for          | ACCATCAGACCCAGCGTTTCC      |
| ELAVL3_mRNA_rev          | GCACGCTCTCGTCTGCCTCCG      |
| EEF1A2_mRNA_for          | CGTGTCGGTGAAGGACATCCG      |
| EEF1A2_mRNA_rev          | CAGCTCCGCAAACCTTGCAGG      |
| PHF10-total_mRNA(Mm)_for | CGGGAGCGCATGGAAGAAAG       |
| PHF10-total_mRNA(Mm)_rev | CCATCACTATCTAGTGCCGGGAGC   |
| PHF10-A_mRNA(Mm)_for     | GGACACCTTCCACGGAAGACAG     |
| PHF10-A_mRNA(Mm)_rev     | CATATCCAAGCAAGAAGGGTGGC    |
| PHF10-D_mRNA(Mm)_for     | GGACACCTTCCACGGAAGACAG     |
| PHF10-D_mRNA(Mm)_rev     | CAGGGGCTTTTTTCTTCTACCTTG   |
| B2M_mRNA(Mm)_for         | CGGGAGCAGGTGGACCAGGG       |
| B2M_mRNA(Mm)_rev         | GTGTCCAGTAGTCGTGTGATGAGGTG |

|                    |                          |
|--------------------|--------------------------|
| actin_mRNA(Mm)_for | GGCACCACACCTTCTACAATGAGC |
| actin_mRNA(Mm)_rev | CCAGAGGCATACAGGGACAGC    |

**Table S5.** Sequences of primers for ChIP.

| Name of ChIP Primers | Sequence (5'-3')         |
|----------------------|--------------------------|
| BDNF_ChIP_for        | GCCGTTTGACCAATCGAAGC     |
| BDNF_ChIP_rev        | GCGGGACAGCGAGCGGGC       |
| MAP2-1_ChIP_for      | GCCGAGGCGGAGCTGCTGCG     |
| MAP2-1_ChIP_rev      | GAAGCGGAAGGGAAGTAAAGG    |
| MAP2-2_ChIP_for      | ACTGTTTCTCTATTTAAGCGGTG  |
| MAP2-2_ChIP_rev      | CAGGAGTCGAGTCTATCAGCC    |
| TrkB_ChIP_for        | CTCCCTGGTGCTTTTGTCTGG    |
| TrkB_ChIP_rev        | GCGGGACAGCGAGCGGGC       |
| NREP_ChIP_for        | GGTGTATATTCCTGACTCCCC    |
| NREP_ChIP_rev        | ACCGTGTAAGTGTAAATGCCTCAG |
| ELAVL3_ChIP_for      | GATTCAGAGTCCCGACCAAGTG   |
| ELAVL3_ChIP_rev      | CGGTCCCGTGTGTTCAAGTC     |
| EEF1A2_ChIP_for      | GATGTCGTGTACTGGCTCCGC    |
| EEF1A2_ChIP_rev      | CGGCACTTACCTGTGTTCTGG    |
| Control_ChIP_for     | GCTCCTGAAGTCCTGCCTCTTG   |
| Control_ChIP_rev     | GGTGCTTTGCAGCAGATGCC     |

## Methods

### Immunoprecipitation

For immunoprecipitation, cerebellum or whole brain were homogenized on ice in PBS buffer supplemented with PIC in Dounce Loose (Millipore), centrifuged at 1000g, 4°C for 10 minutes.

Then the pellet was washed 3 times by 10V of PBS each, also supplemented with PIC, resuspend in Lysis Buffer (50 mM HEPES-KOH pH 7.9; 140 mM NaCl; 1 mM EDTA; 1% Triton X-100; 0.1% Na deoxycholate; 0.1% SDS; PIC and PhIC) and homogenized in Dounce Tight on ice. After sonication, the debris was centrifuged at 4°C, 13.2 krpm for 15 minutes. Supernatant was mixed with antibodies (10 µl antibodies against PHF10 and TAF5 per IP) and Protein A Sepharose (Sigma). Beads were washed twice with IP-500 buffer (25 mM Tris-HCl pH 7.9; 5 mM MgCl<sub>2</sub>; 10% glycerol; 500 mM NaCl; 0.1% NP-40; PIC; PhIC) and once with IP-100 buffer (25 mM Tris-HCl pH 7.9; 5 mM MgCl<sub>2</sub>; 10% glycerol; 100 mM NaCl; 0.1% NP-40; PIC; PhIC). Precipitated proteins were eluted with 4× Laemmli buffer (200 mM Tris-HCl pH 6.8; 4% SDS; 40% glycerol; 0.01% bromophenol blue; 100 mM DTT) and boiled for 10 min.
